# Supplementary material
Source: MDPI journal article supplement (https://www.mdpi.com/2071-1050/15/11/9045)
Supplement: s1 [file s1]

## Introduction

The Human Systems Lab at Colorado State University is conducting research about environmental friendly and efficient mobility solutions. Your participation is voluntary, and we will only share summary results. You can stop at any time. Your responses are confidential, anonymous, and cannot be associated with your identity. Thanks for participating!

## Demographics

**To begin, we have a few questions about you.**

We care about the quality of our survey data and hope to receive the most accurate measures of your opinions. So, it is important to us that you thoughtfully provide your best answer to each question in the survey. Do you commit to

providing your thoughtful and honest answers to the questions in this survey?

- ☐ I will not provide my best answers
- ☐ I will provide my best answers

Are you a resident of the state of Colorado

- ☐ Yes
- ☐ No

What is your gender?

- ☐ Male
- ☐ Female
- ☐ Non-binary / third gender
- ☐ Prefer not to answer

What is your age?

What best describes where you live?

- ☐ Urban
- ☐ Suburban
- ☐ Rural

Which race or ethnicity best describes you?

- ☐ Asian or Pacific Islander
- ☐ Black or African American
- ☐ Hispanic or Latino
- ☐ Native American or Alaskan Native
- ☐ White or Caucasian
- ☐ Multiracial or Biracial
- ☐ Other

What is the highest level of school you have completed?

- ☐ Less than high school degree
- ☐ High school graduate (high school diploma or equivalent including GED)
- ☐ Associate degree in college (2-year)
- ☐ Bachelor's degree in college (4-year)
- ☐ Post-graduate degree (master's, doctoral, JD, MD)
- ☐ Prefer not to answer

What is your current employment status?

- ☐ Student (and employed)
- ☐ Student (not employed)
- ☐ Employed full-time
- ☐ Employed part-time
- ☐ Retired
- ☐ Not currently employed

What is your annual household income?

- ☐ Less than \$35,000
- ☐ \$35,000 - \$49,999
- ☐ \$50,000 - \$74,999
- ☐ \$75,000 - \$99,999
- ☐ \$100,000 - \$149,999
- ☐ \$150,000 or more

## General Commute

**In this section, we want to learn about your commute patterns.**

Do you currently own any of the following? [check all that apply]

- ☐ Bicycle
- ☐ Electric Bicycle (e-bike)
- ☐ Electric Scooter (e-scooter)
- ☐ Personal Vehicle
- ☐ None of the above

How far is your typical commute (one direction)?

- ☐ Less than one mile
- ☐ 1-5 miles
- ☐ 6-10 miles
- ☐ 11-20 miles
- ☐ More than 20 miles

How frequently do you use...

|                                     | Never                 | A few<br>times a<br>year | Monthly               | Weekly                | Daily                 |
|-------------------------------------|-----------------------|--------------------------|-----------------------|-----------------------|-----------------------|
| Shared Electric Scooter (e-scooter) | <input type="radio"/> | <input type="radio"/>    | <input type="radio"/> | <input type="radio"/> | <input type="radio"/> |
| Shared Electric Bicycle             | <input type="radio"/> | <input type="radio"/>    | <input type="radio"/> | <input type="radio"/> | <input type="radio"/> |
| Bicycle                             | <input type="radio"/> | <input type="radio"/>    | <input type="radio"/> | <input type="radio"/> | <input type="radio"/> |

|                        | Never                 | A few<br>times a<br>year | Monthly               | Weekly                | Daily                 |
|------------------------|-----------------------|--------------------------|-----------------------|-----------------------|-----------------------|
| Personal Vehicle       | <input type="radio"/> | <input type="radio"/>    | <input type="radio"/> | <input type="radio"/> | <input type="radio"/> |
| Ride Share (Uber/Lyft) | <input type="radio"/> | <input type="radio"/>    | <input type="radio"/> | <input type="radio"/> | <input type="radio"/> |
| Public Transit         | <input type="radio"/> | <input type="radio"/>    | <input type="radio"/> | <input type="radio"/> | <input type="radio"/> |

## Shared Electric Scooter:

**In this section, we want to learn about your opinions on shared electric scooters (e-scooters).**

What reasons would motivate/have motivated you to use a shared e-scooter? [check all that apply]

- ☐ To save time
- ☐ To save money
- ☐ For parking convenience
- ☐ For fun/adventure
- ☐ For environmental reasons

Which of the following trip types would you consider using shared e-scooter for? [check all that apply]

- ☐ Commuting to place of work or education
- ☐ Taking care of personal stuff (e.g. grocery, bank)
- ☐ Leisure / for fun
- ☐ Commuting from remote parking area to destination
- ☐ When exploring a new city

How often do you use a shared e-scooter as part of your journey for each of these purposes?

|                                                    | Never                 | A few times<br>a year | A few times<br>a month | Weekly                | Every day             |
|----------------------------------------------------|-----------------------|-----------------------|------------------------|-----------------------|-----------------------|
| Commuting to place of work or education            | <input type="radio"/> | <input type="radio"/> | <input type="radio"/>  | <input type="radio"/> | <input type="radio"/> |
| Taking care of personal stuff (e.g. grocery, bank) | <input type="radio"/> | <input type="radio"/> | <input type="radio"/>  | <input type="radio"/> | <input type="radio"/> |
| Leisure / for fun                                  | <input type="radio"/> | <input type="radio"/> | <input type="radio"/>  | <input type="radio"/> | <input type="radio"/> |
| Commuting from remote parking area to destination  | <input type="radio"/> | <input type="radio"/> | <input type="radio"/>  | <input type="radio"/> | <input type="radio"/> |
| When exploring a new city                          | <input type="radio"/> | <input type="radio"/> | <input type="radio"/>  | <input type="radio"/> | <input type="radio"/> |

If a shared e-scooter was not available, which mode would you use for the following trip types...

|                                                    | Walk                  | Bicycle               | Public Transit        | Drive                 | Ride Share (Uber/Lyft) |
|----------------------------------------------------|-----------------------|-----------------------|-----------------------|-----------------------|------------------------|
| Commuting to place of work or education            | <input type="radio"/>  |
| Taking care of personal stuff (e.g. grocery, bank) | <input type="radio"/>  |
| Leisure / for fun                                  | <input type="radio"/>  |
| Commuting from remote parking area to destination  | <input type="radio"/>  |
| When exploring a new city                          | <input type="radio"/>  |

How long is your typical journey on a shared e-scooter?

- ☐ 1-15 minutes
- ☐ 15-30 minutes
- ☐ 30-45 minutes
- ☐ 45-60 minutes
- ☐ 60+ minutes



If you were to use a shared e-scooter, how long would you like the trip to be?

- ☐ Not willing to ride
- ☐ 1-15 minutes
- ☐ 15-30 minutes
- ☐ 30-45 minutes
- ☐ 45-60 minutes
- ☐ 60+ minutes

## Policy and Safety

How necessary do you think it is to wear a helmet while using a shared e-scooter?

- ☐ Extremely unnecessary
- ☐ Somewhat unnecessary
- ☐ Neither necessary nor unnecessary
- ☐ Somewhat necessary
- ☐ Extremely necessary

How often have you experienced conflict with other road users/pedestrians while using shared e-scooters?

- ☐ Never
- ☐ Rarely
- ☐ Sometimes
- ☐ Very Often

If you were to use a shared e-scooter, how concerned would you be about experiencing conflict with other road users/pedestrians while riding?

- ☐ Not concerned at all
- ☐ Somewhat unconcerned
- ☐ Neutral
- ☐ Somewhat concerned
- ☐ Very concerned

How often do you use a helmet when riding a shared e-scooter?

- ☐ Always
- ☐ Usually
- ☐ Sometimes
- ☐ Rarely
- ☐ Never

What infrastructure changes would make you feel safer on or around e-bikes or e-scooters?

- ☐ Separated bike lanes with a physical barrier
- ☐ Smoother pavement
- ☐ Wider bike lanes
- ☐ Designated e-scooter parking
- ☐ Wider sidewalks
- ☐ No ride zones for e-scooters/e-bikes

When you ride an e-scooter/e-bike where do you tend to ride?

- ☐ On road without bike lanes
- ☐ On road but only if there are bike lanes
- ☐ Off-roads greenways and trails
- ☐ On sidewalks

How many times did you crash or nearly crash while riding a shared e-scooter?

- ☐ Never
- ☐ Once
- ☐ Twice
- ☐ Three or more times

As a pedestrian, how safe do you feel around riders on shared e-scooters?

- ☐ Very safe
- ☐ Safe
- ☐ Neither Safe nor unsafe
- ☐ Unsafe
- ☐ Very unsafe

As a driver, how safe do you feel around riders on shared e-scooters?

- ☐ Very safe
- ☐ Safe
- ☐ Neither Safe nor unsafe
- ☐ Unsafe
- ☐ Very unsafe

## **Bicycle vs Scooter**

How safe do you feel about the following statements regarding shared e-scooters/e-bikes:

(If you have not experienced any of these statements, please select the best answer you feel is most appropriate)

|                                                          | Shared Electric Scooter |                       |                       | Shared Electric Bicycle |                       |                       |
|----------------------------------------------------------|-------------------------|-----------------------|-----------------------|-------------------------|-----------------------|-----------------------|
|                                                          | Safe                    | Neutral               | Unsafe                | Safe                    | Neutral               | Unsafe                |
| You riding in vehicle lane                               | <input type="radio"/>   | <input type="radio"/> | <input type="radio"/> | <input type="radio"/>   | <input type="radio"/> | <input type="radio"/> |
| You riding on sidewalk                                   | <input type="radio"/>   | <input type="radio"/> | <input type="radio"/> | <input type="radio"/>   | <input type="radio"/> | <input type="radio"/> |
| You walking and get passed by a shared rider on sidewalk | <input type="radio"/>   | <input type="radio"/> | <input type="radio"/> | <input type="radio"/>   | <input type="radio"/> | <input type="radio"/> |
| You driving and pass a shared rider in vehicle lane      | <input type="radio"/>   | <input type="radio"/> | <input type="radio"/> | <input type="radio"/>   | <input type="radio"/> | <input type="radio"/> |
| Two or more people riding on the same device             | <input type="radio"/>   | <input type="radio"/> | <input type="radio"/> | <input type="radio"/>   | <input type="radio"/> | <input type="radio"/> |

|                     | Shared Electric Scooter |                       |                       | Shared Electric Bicycle |                       |                       |
|---------------------|-------------------------|-----------------------|-----------------------|-------------------------|-----------------------|-----------------------|
|                     | Safe                    | Neutral               | Unsafe                | Safe                    | Neutral               | Unsafe                |
| Speed of the device | <input type="radio"/>   | <input type="radio"/> | <input type="radio"/> | <input type="radio"/>   | <input type="radio"/> | <input type="radio"/> |

How agree do you feel about the following statements regarding shared e-scooters/e-bikes:

(If you have not experienced any of these statements, please select the best answer you feel is most appropriate)

|                                                   | Shared Electric Scooter |                       |                       | Shared Electric Bicycle |                       |                       |
|---------------------------------------------------|-------------------------|-----------------------|-----------------------|-------------------------|-----------------------|-----------------------|
|                                                   | Disagree                | Neutral               | Agree                 | Disagree                | Neutral               | Agree                 |
| Overall, I feel safe riding it                    | <input type="radio"/>   | <input type="radio"/> | <input type="radio"/> | <input type="radio"/>   | <input type="radio"/> | <input type="radio"/> |
| I am satisfied with its sanitary level            | <input type="radio"/>   | <input type="radio"/> | <input type="radio"/> | <input type="radio"/>   | <input type="radio"/> | <input type="radio"/> |
| I feel comfortable riding it                      | <input type="radio"/>   | <input type="radio"/> | <input type="radio"/> | <input type="radio"/>   | <input type="radio"/> | <input type="radio"/> |
| If I am drunk, I would feel comfortable riding it | <input type="radio"/>   | <input type="radio"/> | <input type="radio"/> | <input type="radio"/>   | <input type="radio"/> | <input type="radio"/> |
| It is a good choice while shopping/grocery        | <input type="radio"/>   | <input type="radio"/> | <input type="radio"/> | <input type="radio"/>   | <input type="radio"/> | <input type="radio"/> |
| I am satisfied with its design/usability          | <input type="radio"/>   | <input type="radio"/> | <input type="radio"/> | <input type="radio"/>   | <input type="radio"/> | <input type="radio"/> |

|                                | Shared Electric Scooter |                       |                       | Shared Electric Bicycle |                       |                       |
|--------------------------------|-------------------------|-----------------------|-----------------------|-------------------------|-----------------------|-----------------------|
|                                | Disagree                | Neutral               | Agree                 | Disagree                | Neutral               | Agree                 |
| I need dedicated lanes to ride | <input type="radio"/>   | <input type="radio"/> | <input type="radio"/> | <input type="radio"/>   | <input type="radio"/> | <input type="radio"/> |

What is your main reason for not using shared e-scooters?

What is the main reason for not using shared e-bicycles?

## Personality Questions:

Please indicate the extent to which you agree or disagree with the following statements. Please do not think too long before answering; usually your first inclination is also the best one.

|                                                       | Strongly disagree     | Somewhat disagree     | Neither agree nor disagree | Somewhat agree        | Strongly agree        |
|-------------------------------------------------------|-----------------------|-----------------------|----------------------------|-----------------------|-----------------------|
| Taking risks makes life more fun                      | <input type="radio"/> | <input type="radio"/> | <input type="radio"/>      | <input type="radio"/> | <input type="radio"/> |
| My friends would say that I'm a risk taker            | <input type="radio"/> | <input type="radio"/> | <input type="radio"/>      | <input type="radio"/> | <input type="radio"/> |
| I enjoy taking risks in most aspects of my life       | <input type="radio"/> | <input type="radio"/> | <input type="radio"/>      | <input type="radio"/> | <input type="radio"/> |
| I would take a risk even if it meant I might get hurt | <input type="radio"/> | <input type="radio"/> | <input type="radio"/>      | <input type="radio"/> | <input type="radio"/> |
| Taking risks is an important part of my life          | <input type="radio"/> | <input type="radio"/> | <input type="radio"/>      | <input type="radio"/> | <input type="radio"/> |
| I commonly make risky decisions                       | <input type="radio"/> | <input type="radio"/> | <input type="radio"/>      | <input type="radio"/> | <input type="radio"/> |
| I am a believer of taking chances                     | <input type="radio"/> | <input type="radio"/> | <input type="radio"/>      | <input type="radio"/> | <input type="radio"/> |
| I am attracted, rather than scared, by risk           | <input type="radio"/> | <input type="radio"/> | <input type="radio"/>      | <input type="radio"/> | <input type="radio"/> |

What best describes you when it comes to technology?

- ☐ I am skeptical of new technologies and use them only when I have to.
- ☐ I am usually one of the last people I know to use new technologies.
- ☐ I usually use new technologies when most people I know do.
- ☐ I like new technologies and use them before most people I know.



- ☐ I love new technologies and am among the first to experiment with and use them.

Powered by Qualtrics
